# Supplementary material for: Morphology of Pulleniatina (planktonic foraminifera) from optical microscopy, micro-CT, and SEM investigations
Source: Copernicus journal article supplement (doi:10.5194/jm-44-213-2025), 2025-08-06
Supplement: Supplementary file 1 [file jm-44-213-2025-supplement.zip]

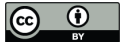

*Supplement of*

## **Morphology of *Pulleniatina* (planktonic foraminifera) from optical microscopy, micro-CT, and SEM investigations**

**Alessio Fabbrini et al.**

*Correspondence to:* Alessio Fabbrini (a.fabbrini@ucl.ac.uk)

- jm-44-213-2025-supplement-title-page.pdf
- Basic\_User\_Guide\_3D\_visualisation\_manipulation\_README.pdf
- Fabbrini et al\_Pulleniatina\_3D\_Dataset.csv

The copyright of individual parts of the supplement might differ from the article licence.
